# Supplementary material for: Lipid disequilibrium disrupts ER proteostasis by impairing ERAD substrate glycan trimming and dislocation
Source: PubMed Central journal article supplement — Mol Biol Cell. 2017 Jan 15;28(2):270–84. doi: 10.1091/mbc.E16-07-0483 (PMC5231896; doi:10.1091/mbc.e16-07-0483), 2017-01-15
Supplement: supp_E16-07-0483v1_CombinedSupMats.pdf [file supp_E16-07-0483v1_CombinedSupMats.pdf]

# Supplemental Materials

*Molecular Biology of the Cell*

To et al.

## SUPPLEMENTAL MATERIALS

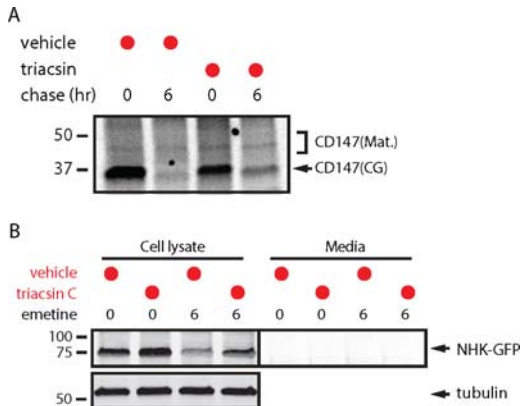

**FIGURE S1. Analysis of CD147 maturation and NHK secretion.** (A) HEK293 cells were pretreated with vehicle or 1  $\mu\text{g}/\text{mL}$  triacsin C for 16 hr, pulse labeled, and samples collected at 0 hr and 6 hr. CD147 was immunoprecipitated, separated by SDS-PAGE, and radioactivity detected using a Typhoon 9400. (B) HEK293 cells expressing NHK-GFP were treated with vehicle or 1  $\mu\text{g}/\text{mL}$  triacsin C for 16 hr. Cells were washed with PBS, and the media was replaced with serum-free OPTI-MEM containing vehicle or 1  $\mu\text{g}/\text{mL}$  triacsin C for the remaining 6 hr. Lysates and NHK-GFP immunoprecipitated from the media were analyzed by immunoblotting.

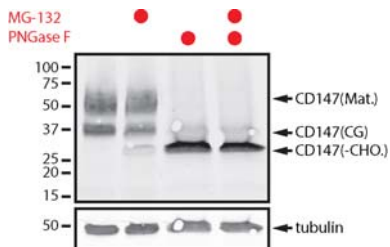

**FIGURE S2. Proteasome inhibition causes accumulation of CD147 in a deglycosylated form.** HEK293 cells incubated with vehicle or 10  $\mu\text{M}$  MG-132 for 6 hr were lysed in 1% SDS. Lysates were then incubated in the presence and absence of PNGase F for 30 min at 37°C. Proteins were separated by SDS-PAGE and analyzed by immunoblotting.

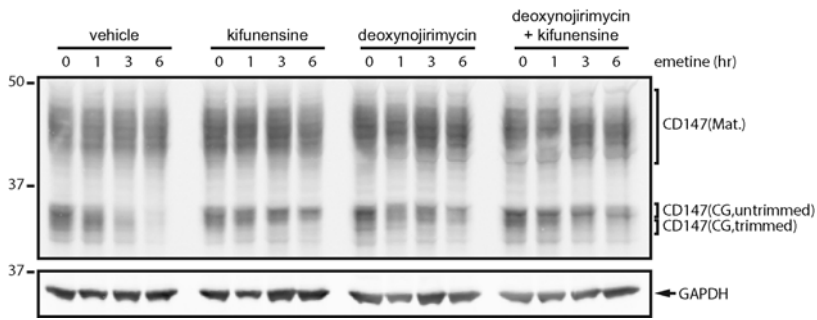

**FIGURE S3. Analysis of glucosidases and mannosidases in CD147 glycan trimming and degradation.** HEK293 cells were incubated with 75  $\mu$ M emetine in the presence and absence of 5  $\mu$ g/mL kifunensine and 50  $\mu$ M deoxynojirimycin as indicated. SDS lysates were separated on large format SDS-PAGE gels and analyzed by immunoblotting to visualize the different CD147 glycoforms.

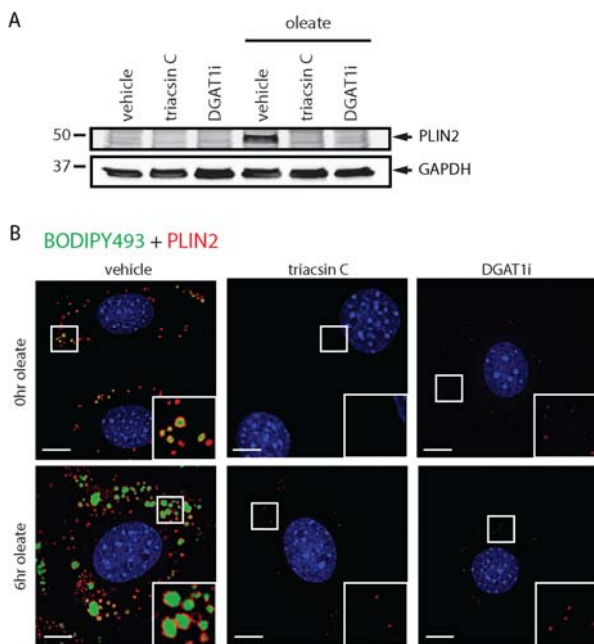

**FIGURE S4. Triacsin C and DGAT1 reduce the amount of PLIN2-positive lipid droplets.** (A) DGAT2<sup>-/-</sup> MEFs were pretreated with 1  $\mu$ g/mL triacsin C or 20  $\mu$ M DGAT1i for 3 hr and then incubated with 200  $\mu$ M oleate for 0 hr or 6 hr as indicated. Cells were lysed in 1% SDS and PLIN2 levels were analyzed by immunoblotting. (B) Cells were treated as in panel A and immunofluorescence microscopy employed to visualize PLIN2 (red), LDs (green), and nuclei (blue). Scale bar = 10  $\mu$ m.

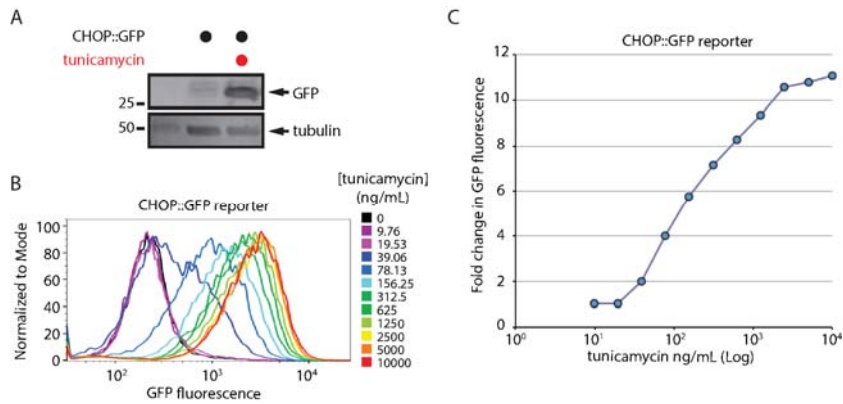

**FIGURE S5. Characterization of a CHOP::GFP reporter cell line.** (A) Untransfected HEK293 cells or HEK293 cells stably expressing the CHOP::GFP reporter plasmid were incubated in the presence or absence of 5  $\mu\text{g}/\text{mL}$  tunicamycin as indicated. GFP levels were analyzed by immunoblotting. (B) HEK293 cells stably expressing a CHOP::GFP construct were treated with increasing concentrations of tunicamycin. GFP levels were measured using flow cytometry and are represented as a histogram normalized to the mode. (C) The fold change in GFP fluorescence levels relative to time 0 hr from cells treated as in panel B is shown.

**SUPPLEMENTAL TABLES**

**TABLE S1. High confidence Hrd1 interacting proteins.**

**TABLE S2. SILAC proteomic analysis of Hrd1 interacting proteins.**

**TABLE S3. Metabolomic Profiling of triacsin C treated cells.**
